# Supplementary material for: Comparative genomic analysis of Aeromonas dhakensis and Aeromonas hydrophila from diseased striped catfish fingerlings cultured in Vietnam
Source: Front Microbiol. 2023 Sep 22;14:1254781. doi: 10.3389/fmicb.2023.1254781 (PMC10556525; doi:10.3389/fmicb.2023.1254781)
Supplement: Supplementary file 4 [file Table_4.XLSX]

## Sheet: VFDB results
Virulence factors	Related genes	AH 01	AH 02	AH 03	AH 04	AH 05	AH 06	AH 07	AH 09	AH 10	AH 13	AH 15	AH 28	AH 41	AH 42	AH 45	AH 47	AH 58	AH 59	AH 61	AH 63	AH 70	AH 72	AH 75	AH 80	AH 81	AH 82	AH 84	AH 85	AH 86	AH 87
Flp type IV pili	flp1											orf03498								orf03930			orf03112		orf04131	orf03932
	flpA											orf03497								orf03931			orf03111		orf04130	orf03933
	flpB											orf03496								orf03932			orf03110		orf04129	orf03934
	flpC											orf03495								orf03933			orf03109		orf04128	orf03935
	flpD											orf03494								orf03934			orf03108		orf04127	orf03936
	flpE											orf03493								orf03935			orf03107		orf04126	orf03937
	flpF											orf03492								orf03936			orf03106		orf04125	orf03938
	flpG											orf03491								orf03937			orf03105		orf04124	orf03939
	flpH											orf03490								orf03938			orf03104		orf04123	orf03940
	flpI											orf03489								orf03939			orf03103			orf03941
	flpJ											orf03488								orf03865			orf03102		orf04038	orf03856
	flpK											orf03487								orf03864			orf03101		orf04037	orf03855
	flpL											orf03486								orf03863			orf03100		orf04036	orf03854
Lateral flagella	flgC
	flgE
	flgI
	flgJ
	fliF
	fliG
	fliP
	lafB
	lafC
	lafE
	lafF
	lafK
	lafS
	lafT
	lafU
	lafX
	lfgA
	lfgB
	lfgF
	lfgG
	lfgH
	lfgK
	lfgL
	lfgM
	lfgN
	lfhA
	lfhB
	lfiE
	lfiH
	lfiI
	lfiJ
	lfiM
	lfiN
	lfiQ
	lfiR
	maf5
Mannosesensitive hemagglutinin (Msh) pilus	mshA											orf01813					orf02629			orf01733		orf02090			orf01713	orf02402
	mshB	orf02507	orf01653	orf02150	orf01063	orf02903	orf01472	orf02130	orf02895	orf01389	orf03279	orf01814	orf01774	orf02735	orf01975	orf01324	orf02628	orf01930	orf02561	orf01734	orf01787	orf02091	orf00874	orf01913	orf01714	orf02403	orf01026	orf00756	orf01514	orf02189	orf02350
	mshC	orf02506	orf01651	orf02151	orf01062	orf02905	orf01474	orf02132	orf02894	orf01387	orf03280	orf01812	orf01773	orf02736	orf01974	orf01323	orf02630	orf01929	orf02563	orf01732	orf01786	orf02089	orf00876	orf01912	orf01712	orf02401	orf01027	orf00757	orf01513	orf02188	orf02348
	mshD	orf02505	orf01650	orf02152	orf01061	orf02906	orf01475	orf02133	orf02893	orf01386	orf03281	orf01811	orf01772	orf02737	orf01973	orf01322	orf02631	orf01928	orf02564	orf01731	orf01785	orf02088	orf00877	orf01911	orf01711	orf02400	orf01028	orf00758	orf01512	orf02187	orf02347
	mshE	orf02510	orf01656	orf02147	orf01066	orf02900	orf01469	orf02127	orf02898	orf01392	orf03276	orf01817	orf01777	orf02732	orf01978	orf01327	orf02625	orf01933	orf02558	orf01737	orf01790	orf02094	orf00871	orf01916	orf01717	orf02406	orf01023	orf00753	orf01517	orf02192	orf02353
	mshF	orf02508	orf01654	orf02149	orf01064	orf02902	orf01471	orf02129	orf02896	orf01390	orf03278	orf01815	orf01775	orf02734	orf01976	orf01325	orf02627	orf01931	orf02560	orf01735	orf01788	orf02092	orf00873	orf01914	orf01715	orf02404	orf01025	orf00755	orf01515	orf02190	orf02351
	mshG	orf02509	orf01655	orf02148	orf01065	orf02901	orf01470	orf02128	orf02897	orf01391	orf03277	orf01816	orf01776	orf02733	orf01977	orf01326	orf02626	orf01932	orf02559	orf01736	orf01789	orf02093	orf00872	orf01915	orf01716	orf02405	orf01024	orf00754	orf01516	orf02191	orf02352
	mshI1	orf02517	orf01663	orf02140	orf01073	orf02893	orf01462	orf02120	orf02905	orf01399	orf03269	orf01823	orf01784	orf02725	orf01985	orf01334	orf02618	orf01940	orf02551	orf01743	orf01797	orf02101	orf00865	orf01923	orf01723	orf02412	orf01016	orf00746	orf01524	orf02199	orf02360
	mshI	orf02518	orf01664	orf02139	orf01074	orf02892	orf01461	orf02119	orf02906	orf01400	orf03268	orf01824	orf01785	orf02724	orf01986	orf01335	orf02617	orf01941	orf02550	orf01744	orf01798	orf02102	orf00864	orf01924	orf01724	orf02413	orf01015	orf00745	orf01525	orf02200	orf02361
	mshJ	orf02516	orf01662	orf02141	orf01072	orf02894	orf01463	orf02121	orf02904	orf01398	orf03270	orf01822	orf01783	orf02726	orf01984	orf01333	orf02619	orf01939	orf02552	orf01742	orf01796	orf02100	orf00866	orf01922	orf01722	orf02411	orf01017	orf00747	orf01523	orf02198	orf02359
	mshK	orf02515	orf01661	orf02142	orf01071	orf02895	orf01464	orf02122	orf02903	orf01397	orf03271	orf01821	orf01782	orf02727	orf01983	orf01332	orf02620	orf01938	orf02553	orf01741	orf01795	orf02099	orf00867	orf01921	orf01721	orf02410	orf01018	orf00748	orf01522	orf02197	orf02358
	mshL	orf02514	orf01660	orf02144	orf01070	orf02897	orf01466	orf02124	orf02902	orf01396	orf03273	orf01820	orf01781	orf02729	orf01982	orf01331	orf02622	orf01937	orf02555	orf01740	orf01794	orf02098	orf00868	orf01920	orf01720	orf02409	orf01020	orf00750	orf01521	orf02196	orf02357
	mshM	orf02512	orf01658	orf02145	orf01068	orf02898	orf01467	orf02125	orf02900	orf01394	orf03274	orf01819	orf01779	orf02730	orf01980	orf01329	orf02623	orf01935	orf02556	orf01739	orf01792	orf02096	orf00869	orf01918	orf01719	orf02408	orf01021	orf00751	orf01519	orf02194	orf02355
	mshN	orf02511	orf01657	orf02146	orf01067	orf02899	orf01468	orf02126	orf02899	orf01393	orf03275	orf01818	orf01778	orf02731	orf01979	orf01328	orf02624	orf01934	orf02557	orf01738	orf01791	orf02095	orf00870	orf01917	orf01718	orf02407	orf01022	orf00752	orf01518	orf02193	orf02354
	mshO	orf02504	orf01649	orf02153	orf01060	orf02907	orf01476	orf02134	orf02892	orf01385	orf03282	orf01810	orf01771	orf02738	orf01972	orf01321	orf02632	orf01927	orf02565	orf01730	orf01784	orf02087	orf00878	orf01910	orf01710	orf02399	orf01029	orf00759	orf01511	orf02186	orf02346
	mshP	orf02503	orf01648	orf02154	orf01059	orf02908	orf01477	orf02135	orf02891	orf01384	orf03283	orf01809	orf01770	orf02739	orf01971	orf01320	orf02633	orf01926	orf02566	orf01729	orf01783	orf02086	orf00879	orf01909	orf01709	orf02398	orf01030	orf00760	orf01510	orf02185	orf02345
	mshQ	orf02502	orf01647	orf02155	orf01058	orf02909	orf01478	orf02136	orf02890	orf01383	orf03284	orf01808	orf01769	orf02740	orf01970	orf01319	orf02634	orf01925	orf02567	orf01728	orf01782	orf02085	orf00880	orf01908	orf01708	orf02397	orf01031	orf00761	orf01509	orf02184	orf02344
Polar flagella	Undetermined	orf00717	orf01233	orf01039	orf01656	orf01615	orf00734	orf01048	orf01673	orf01554	orf01815	orf00825	orf01657	orf00700	orf01718	orf01121	orf01488	orf00837	orf01910	orf00069	orf00632	orf00989	orf00623	orf01641	orf01975	orf00557	orf00593	orf00158	orf01340	orf00663	orf00973
	Undetermined	orf01012	orf01764	orf00728	orf01476	orf01533	orf00511	orf00386	orf00541	orf01605	orf01774		orf01521	orf01138	orf01048	orf02084	orf01611	orf01703	orf00898		orf01905	orf01433		orf01459			orf00966	orf00464	orf01012	orf01045	orf01277
	cheA2
	cheB2
	cheR3
	cheV
	cheW
	cheY
	cheZ
	flaA																					orf02801
	flaB																orf02531			orf00683		orf02802			orf00786; orf00789
	flaG											orf01038								orf00682					orf00785
	flaH	orf04167	orf03179	orf03029	orf00786	orf03607	orf03208	orf02287	orf03589	orf02951	orf02678	orf01037	orf03658	orf01954	orf02883	orf00194	orf02535	orf02752	orf04022	orf00681	orf02574	orf02805	orf00448	orf02009	orf00784	orf02294	orf02035	orf01915	orf03238	orf02907	orf03880
	flaJ	orf04166	orf03180	orf03030	orf00785	orf03606	orf03209	orf02286	orf03588	orf02952	orf02677		orf03659	orf01955	orf02882	orf00193	orf02536	orf02751	orf04021		orf02573	orf02806		orf02010	orf00783		orf02034	orf01914	orf03239	orf02906	orf03879
	flgA	orf01585	orf00574	orf00564	orf00878	orf01292	orf01327	orf00614	orf00777	orf01949	orf01874	orf01401	orf01562	orf01210	orf00389	orf00499	orf00870	orf01002	orf01005	orf01045	orf00384	orf00653	orf01678	orf00995	orf01210	orf01987	orf01339	orf00846	orf00743	orf01578	orf01517
	flgB	orf01582	orf00571	orf00561	orf00875	orf01289	orf01330	orf00611	orf00774	orf01952	orf01871	orf01398	orf01559	orf01207	orf00392	orf00496	orf00866	orf01005	orf01002	orf01042	orf00381	orf00649	orf01675	orf00992	orf01207	orf01984	orf01336	orf00849	orf00740	orf01575	orf01514
	flgC	orf01581	orf00570	orf00560	orf00874	orf01288	orf01331	orf00610	orf00773	orf01953	orf01870	orf01397	orf01558	orf01206	orf00393	orf00495	orf00865	orf01006	orf01001	orf01041	orf00380	orf00648	orf01674	orf00991	orf01206	orf01983	orf01335	orf00850	orf00739	orf01574	orf01513
	flgD	orf01580	orf00569	orf00559	orf00873	orf01287	orf01332	orf00609	orf00772	orf01954	orf01869	orf01396	orf01557	orf01205	orf00394	orf00494	orf00864	orf01007	orf01000	orf01040	orf00379	orf00647	orf01673	orf00990	orf01205	orf01982	orf01334	orf00851	orf00738	orf01573	orf01512
	flgE	orf01579	orf00568	orf00558	orf00872	orf01286	orf01333	orf00608	orf00771	orf01955	orf01868	orf01395	orf01556	orf01204	orf00395	orf00493	orf00863	orf01008	orf00999	orf01039	orf00378	orf00646	orf01672	orf00989	orf01204	orf01981	orf01333	orf00852	orf00737	orf01572	orf01511
	flgF	orf01578	orf00567	orf00557	orf00871	orf01285	orf01334	orf00607	orf00770	orf01956	orf01867	orf01394	orf01555	orf01203	orf00396	orf00492	orf00862	orf01009	orf00998	orf01038	orf00377	orf00645	orf01671	orf00988	orf01203	orf01980	orf01332	orf00853	orf00736	orf01571	orf01510
	flgG	orf01577	orf00566	orf00556	orf00870	orf01284	orf01335	orf00606	orf00769	orf01957	orf01866	orf01393	orf01554	orf01202	orf00397	orf00491	orf00861	orf01010	orf00997	orf01037	orf00376	orf00644	orf01670	orf00987	orf01202	orf01979	orf01331	orf00854	orf00735	orf01570	orf01509
	flgH	orf01576	orf00565	orf00555	orf00869	orf01283	orf01336	orf00605	orf00768	orf01958	orf01865	orf01392	orf01553	orf01201	orf00398	orf00490	orf00860	orf01011	orf00996	orf01036	orf00375	orf00643	orf01669	orf00986	orf01201	orf01978	orf01330	orf00855	orf00734	orf01569	orf01508
	flgI	orf01575	orf00564	orf00554	orf00868	orf01282	orf01337	orf00604	orf00767	orf01959	orf01864	orf01391	orf01552	orf01200	orf00399	orf00489	orf00859	orf01012	orf00995	orf01035	orf00374	orf00642	orf01668	orf00985	orf01200	orf01977	orf01329	orf00856	orf00733	orf01568	orf01507
	flgJ	orf01574	orf00563	orf00553	orf00867	orf01281	orf01338	orf00603	orf00766	orf01960	orf01863	orf01390	orf01551	orf01199	orf00400	orf00488	orf00858	orf01013	orf00994	orf01034	orf00373	orf00641	orf01667	orf00984	orf01199	orf01976	orf01328	orf00857	orf00732	orf01567	orf01506
	flgK	orf01573	orf00562	orf00552	orf00866	orf01280	orf01339	orf00602	orf00765	orf01961	orf01862	orf01389	orf01550	orf01198	orf00401	orf00487	orf00857	orf01014	orf00993	orf01033	orf00372	orf00640	orf01666	orf00983	orf01198	orf01975	orf01327	orf00858	orf00731	orf01566	orf01505
	flgL	orf01572	orf00561	orf00551	orf00865	orf01279	orf01340	orf00601	orf00764	orf01962	orf01861	orf01388	orf01549	orf01197	orf00402	orf00486	orf00856	orf01015	orf00992	orf01032	orf00371	orf00639	orf01665	orf00982	orf01197	orf01974	orf01326	orf00859	orf00730	orf01565	orf01504
	flgM					orf01293		orf00615		orf01948		orf01402				orf00500	orf00871			orf01046		orf00654	orf01679		orf01211	orf01988		orf00845		orf01579
	flgN	orf01587	orf00576	orf00566	orf00880	orf01294	orf01325	orf00616	orf00779	orf01947	orf01876	orf01403	orf01564	orf01212	orf00387	orf00501	orf00872	orf01000	orf01007	orf01047	orf00386	orf00655	orf01680	orf00997	orf01212	orf01989	orf01341	orf00844	orf00745	orf01580	orf01519
	flhA	orf00707	orf01223	orf01029	orf01646	orf01625	orf00724	orf01058	orf01663	orf01564	orf01825	orf00815	orf01647	orf00690	orf01728	orf01131	orf01478	orf00827	orf01920	orf00059	orf00622	orf00999	orf01859	orf01651	orf01964	orf00546	orf00603	orf00168	orf01350	orf00653	orf00983
	flhB	orf00706	orf01222	orf01028	orf01645	orf01626	orf00723	orf01059	orf01662	orf01565	orf01826	orf00814	orf01646	orf00689	orf01729	orf01132	orf01477	orf00826	orf01921	orf00058	orf00621	orf01000	orf01860	orf01652	orf01963	orf00545	orf00604	orf00169	orf01351	orf00652	orf00984
	flhF	orf00708	orf01224	orf01030	orf01647	orf01624	orf00725	orf01057	orf01664	orf01563	orf01824	orf00816	orf01648	orf00691	orf01727	orf01130	orf01479	orf00828	orf01919	orf00060	orf00623	orf00998	orf00614	orf01650	orf01965	orf00547	orf00602	orf00167	orf01349	orf00654	orf00982
	flhG	orf00709	orf01225	orf01031	orf01648	orf01623	orf00726	orf01056	orf01665	orf01562	orf01823	orf00817	orf01649	orf00692	orf01726	orf01129	orf01480	orf00829	orf01918	orf00061	orf00624	orf00997	orf00615	orf01649	orf01967	orf00549	orf00601	orf00166	orf01348	orf00655	orf00981
	fliA	orf00710	orf01226	orf01032	orf01649	orf01622	orf00727	orf01055	orf01666	orf01561	orf01822	orf00818	orf01650	orf00693	orf01725	orf01128	orf01481	orf00830	orf01917	orf00062	orf00625	orf00996	orf00616	orf01648	orf01968	orf00550	orf00600	orf00165	orf01347	orf00656	orf00980
	fliE	orf00691	orf01207	orf01013	orf01630	orf01641	orf00708	orf01074	orf01647	orf01579	orf01841	orf00800	orf01632	orf00674	orf01744	orf01147	orf01462	orf00811	orf01936	orf00044	orf00606	orf01015	orf01874	orf01666	orf01949	orf00531	orf00618	orf00184	orf01365	orf00637	orf00999
	fliF	orf00692	orf01208	orf01014	orf01631	orf01640	orf00709	orf01073	orf01648	orf01578	orf01840	orf00801	orf01633	orf00675	orf01743	orf01146	orf01463	orf00812	orf01935	orf00045	orf00607	orf01014	orf01873	orf01665	orf01950	orf00532	orf00617	orf00183	orf01364	orf00638	orf00998
	fliG	orf00693	orf01209	orf01015	orf01632	orf01639	orf00710	orf01072	orf01649	orf01577	orf01839	orf00802	orf01634	orf00676	orf01742	orf01145	orf01464	orf00813	orf01934	orf00046	orf00608	orf01013	orf01872	orf01664	orf01951	orf00533	orf00616	orf00182	orf01363	orf00639	orf00997
	fliH	orf00694	orf01210	orf01016	orf01633	orf01638	orf00711	orf01071	orf01650	orf01576	orf01838	orf00803	orf01635	orf00677	orf01741	orf01144	orf01465	orf00814	orf01933	orf00047	orf00609	orf01012	orf01871	orf01663	orf01952	orf00534	orf00615	orf00181	orf01362	orf00640	orf00996
	fliI	orf00695	orf01211	orf01017	orf01634	orf01637	orf00712	orf01070	orf01651	orf01575	orf01837	orf00804	orf01636	orf00678	orf01740	orf01143	orf01466	orf00815	orf01932	orf00048	orf00610	orf01011	orf01870	orf01662	orf01953	orf00535	orf00614	orf00180	orf01361	orf00641	orf00995
	fliJ	orf00696	orf01212	orf01018	orf01635	orf01636	orf00713	orf01069	orf01652	orf01574	orf01836	orf00805	orf01637	orf00679	orf01739	orf01142	orf01467	orf00816	orf01931	orf00049	orf00611	orf01010	orf01869	orf01661	orf01954	orf00536	orf00613	orf00179	orf01360	orf00642	orf00994
	fliK	orf00697	orf01213	orf01019	orf01636	orf01635	orf00714	orf01068	orf01653	orf01573	orf01835	orf00806	orf01638	orf00680	orf01738	orf01141	orf01468	orf00817	orf01930	orf00050	orf00612	orf01009	orf01868	orf01660	orf01955	orf00537	orf00612	orf00178	orf01359	orf00643	orf00993
	fliL	orf00698	orf01214	orf01020	orf01637	orf01634	orf00715	orf01067	orf01654	orf01572	orf01834	orf00807	orf01639	orf00681	orf01737	orf01140	orf01469	orf00818	orf01929	orf00051	orf00613	orf01008	orf01867	orf01659	orf01956	orf00538	orf00611	orf00177	orf01358	orf00644	orf00992
	fliM	orf00699	orf01215	orf01021	orf01638	orf01633	orf00716	orf01066	orf01655	orf01571	orf01833	orf00808	orf01640	orf00682	orf01736	orf01139	orf01470	orf00819	orf01928	orf00052	orf00614	orf01007	orf01866	orf01658	orf01957	orf00539	orf00610	orf00176	orf01357	orf00645	orf00991
	fliN	orf00700	orf01216	orf01022	orf01639	orf01632	orf00717	orf01065	orf01656	orf01570	orf01832	orf00809	orf01641	orf00683	orf01735	orf01138	orf01471	orf00820	orf01927	orf00053	orf00615	orf01006	orf01865	orf01657	orf01958	orf00540	orf00609	orf00175	orf01356	orf00646	orf00990
	fliO	orf00701	orf01217	orf01023	orf01640	orf01631	orf00718	orf01064	orf01657	orf01569	orf01831	orf00810	orf01642	orf00684	orf01734	orf01137	orf01472	orf00821	orf01926	orf00054	orf00616	orf01005	orf01864	orf01656	orf01959	orf00541	orf00608	orf00174	orf01355	orf00647	orf00989
	fliP	orf00702	orf01218	orf01024	orf01641	orf01630	orf00719	orf01063	orf01658	orf01568	orf01830	orf00811	orf01643	orf00685	orf01733	orf01136	orf01473	orf00822	orf01925	orf00055	orf00617	orf01004	orf01863	orf01655	orf01960	orf00542	orf00607	orf00173	orf01354	orf00648	orf00988
	fliQ	orf00703	orf01219	orf01025	orf01642	orf01629	orf00720	orf01062	orf01659	orf01567	orf01829	orf00812	orf01644	orf00686	orf01732	orf01135	orf01474	orf00823	orf01924	orf00056	orf00618	orf01003	orf01862	orf01654	orf01961	orf00543	orf00606	orf00172	orf01353	orf00649	orf00987
	fliR	orf00704	orf01220	orf01026	orf01643	orf01628	orf00721	orf01061	orf01660	orf01566	orf01828	orf00813	orf01645	orf00687	orf01731	orf01134	orf01475	orf00824	orf01923	orf00057	orf00619	orf01002	orf01861	orf01653	orf01962	orf00544	orf00605	orf00171	orf01352	orf00650	orf00986
	flmD	orf01010	orf01766	orf00726	orf01478	orf01535	orf00513	orf00388	orf00539	orf01607	orf01772	orf01034	orf01519	orf01140	orf01050	orf02086	orf01613	orf01701	orf00896	orf00678	orf01903	orf01435	orf00445	orf01457	orf00777	orf02291	orf00964	orf00466	orf01010	orf01043	orf01275
	flmH	orf01014; orf03465	orf00028; orf01762	orf00730; orf02583	orf00159; orf01474	orf00332; orf01531	orf00184; orf00509	orf00384; orf02257	orf00029; orf00543	orf00091; orf01603	orf00159; orf01776	orf00081	orf00427; orf01523	orf00159; orf01136	orf01046; orf01592	orf00763; orf02082	orf00228; orf01609	orf00159; orf01705	orf00141; orf00900	orf00733	orf00259; orf01907	orf00426; orf01431	orf00046	orf00576; orf01461	orf00262	orf00053	orf00968; orf02717	orf00462; orf03281	orf01014; orf03612	orf00259; orf01047	orf00028; orf01279
	flrA	orf02849	orf00555	orf00545	orf00859	orf01273	orf02643	orf00595	orf00758	orf03294	orf01495	orf01381	orf03227	orf03176	orf00408	orf00480	orf00850	orf01021	orf00986	orf01026	orf00365	orf00633	orf01659	orf00976	orf01190	orf01968	orf02805	orf03092	orf00724	orf02565	orf03201
	flrB	orf02848	orf00554	orf00544	orf00858	orf01272	orf02644	orf00594	orf00757	orf03295	orf01494	orf01380	orf03226	orf03175	orf00409	orf00479	orf00849	orf01022	orf00985	orf01025	orf00364	orf00632	orf01658	orf00975	orf01189	orf01967	orf02804	orf03093	orf00723	orf02564	orf03200
	flrC	orf02847	orf00553	orf00543	orf00857	orf01271	orf02645	orf00593	orf00756	orf03296	orf01493	orf01379	orf03225	orf03174	orf00410	orf00478	orf00848	orf01023	orf00984	orf01024	orf00363	orf00631	orf01657	orf00974	orf01188	orf01966	orf02803	orf03094	orf00722	orf02563	orf03199
	maf1				orf00784				orf02177					orf01956		orf00192								orf02011
	maf2	orf01008	orf01768	orf00724	orf01480	orf01537	orf00515	orf00390	orf00537	orf01609	orf01770		orf01517	orf01142	orf01052	orf02088	orf01615	orf01699	orf00894		orf01901	orf01437		orf01455			orf00962	orf00468	orf01008	orf01041	orf01273
	motX	orf00827	orf00954	orf01930	orf01001	orf01115	orf01393	orf00327	orf00997	orf00460	orf00999	orf01130	orf00981	orf00808	orf00537	orf01025	orf02053	orf01139	orf00820	orf01119	orf00925	orf02006	orf01740	orf02630	orf01392	orf02049	orf00734	orf00900	orf00596	orf01781	orf00615
	motY	orf00638	orf02300	orf03751	orf01595	orf00527	orf00672	orf00547	orf03837	orf00681	orf01299	orf01967	orf01232	orf01405	orf01209	orf00368	orf00119	orf01364	orf01062	orf01281	orf01435	orf01274	orf01108	orf01150	orf01873	orf01270	orf03631	orf02176	orf02461	orf00586	orf00781
	nueA	orf01011; orf02321	orf01765; orf02461	orf00727; orf02269	orf01477; orf03905	orf01534; orf03411	orf00512; orf04093	orf00387; orf02933	orf00540; orf03283	orf01606; orf02802	orf01443; orf01773	orf02674	orf01520; orf02886	orf01139; orf03480	orf01049; orf02857	orf02085; orf02723	orf01612; orf03501	orf01702; orf03774	orf00897; orf02598	orf02131	orf00312; orf01904	orf00579; orf01434	orf02592	orf01458; orf02901	orf02145	orf02157	orf00965; orf02200	orf00465; orf02123	orf01011; orf02375	orf01044; orf02252	orf01276; orf02957
	nueB	orf01009	orf01767	orf00725	orf01479	orf01536	orf00514	orf00389	orf00538	orf01608	orf01771	orf01035	orf01518	orf01141	orf01051	orf02087	orf01614	orf01700	orf00895	orf00679	orf01902	orf01436	orf00446	orf01456	orf00778	orf02292	orf00963	orf00467	orf01009	orf01042	orf01274
	pomA2	orf02469	orf02373	orf00417	orf00368	orf01925	orf02231	orf02071	orf00354	orf01270	orf01610	orf00365	orf00150	orf02665	orf00300	orf02342	orf02558	orf00338	orf00438	orf00511	orf01156	orf00236	orf00986	orf00899	orf00544	orf01194	orf01300	orf01123	orf00274	orf00148	orf01575
	pomA	orf00715	orf01231	orf01037	orf01654	orf01617	orf00732	orf01050	orf01671	orf01556	orf01817	orf00823	orf01655	orf00698	orf01720	orf01123	orf01486	orf00835	orf01912	orf00067	orf00630	orf00991	orf00621	orf01643	orf01973	orf00555	orf00595	orf00160	orf01342	orf00661	orf00975
	pomB2	orf02470; orf02869	orf02372; orf03483	orf00418; orf03313	orf00367; orf02599	orf01924; orf02077	orf02230; orf03302	orf02070; orf02968	orf00353; orf02516	orf01269; orf03776	orf00281; orf01609	orf00366; orf02551	orf00149; orf03670	orf02399; orf02666	orf00299; orf03260	orf02341; orf02690	orf02559; orf03780	orf00337; orf03548	orf00439; orf03640	orf00510; orf03828	orf01030; orf01157	orf00237; orf03368	orf00987; orf01975	orf00898; orf03651	orf00545; orf02280	orf01193; orf02498	orf01299; orf02825	orf01124; orf02282	orf00275; orf04032	orf00147; orf03322	orf01376; orf01576
	pomB	orf00716	orf01232	orf01038	orf01655	orf01616	orf00733	orf01049	orf01672	orf01555	orf01816	orf00824	orf01656	orf00699	orf01719	orf01122	orf01487	orf00836	orf01911	orf00068	orf00631	orf00990	orf00622	orf01642	orf01974	orf00556	orf00594	orf00159	orf01341	orf00662	orf00974
Tap type IV pili	tapA																					orf00773			orf00632
	tapB	orf00496	orf00202	orf00326	orf00534	orf00706	orf00388	orf00197	orf00661	orf00179	orf00718	orf01273	orf00751	orf00252	orf00779	orf00060	orf00434	orf00686	orf01371	orf02720	orf00482	orf00774	orf01246	orf00168	orf00633	orf01459	orf00161	orf00060	orf00161	orf00353	orf00213
	tapC	orf00495	orf00203	orf00327	orf00535	orf00707	orf00389	orf00198	orf00660	orf00180	orf00719	orf01274	orf00752	orf00251	orf00780	orf00061	orf00435	orf00687	orf01372	orf02721	orf00483	orf00775	orf01247	orf00169	orf00634	orf01460	orf00162	orf00061	orf00162	orf00352	orf00212
	tapD	orf00494	orf00204	orf00328	orf00536	orf00708	orf00390	orf00199	orf00659	orf00181	orf00720	orf01275	orf00753	orf00250	orf00781	orf00062	orf00436	orf00688	orf01373	orf02722	orf00484	orf00776	orf01248	orf00170	orf00635	orf01461	orf00163	orf00062	orf00163	orf00351	orf00211
	tapF	orf01951	orf01926	orf01519	orf00735	orf02500	orf01661	orf02586	orf02227	orf02264	orf00308	orf00979	orf02630	orf02987	orf02401	orf00143	orf02013	orf02334	orf02863	orf00622	orf01001	orf02351	orf00389	orf02699	orf00718	orf02899	orf01427	orf02589	orf02231	orf01510	orf01791
	tapM	orf01176	orf00434	orf02079	orf00641	orf00939	orf03558	orf01923	orf00239	orf00285	orf00822	orf00938	orf00036	orf00395	orf00186	orf00319	orf00590	orf00223	orf02440	orf01665	orf00795	orf00356	orf02308	orf02356	orf02373	orf00905	orf00796	orf00323	orf00389	orf00033	orf02127
	tapN	orf01175	orf00433	orf02080	orf00640	orf00938	orf03559	orf01922	orf00238	orf00284	orf00821	orf00939	orf00035	orf00396	orf00185	orf00320	orf00591	orf00222	orf02441	orf01664	orf00796	orf00357	orf02307	orf02355	orf02372	orf00906	orf00795	orf00324	orf00390	orf00032	orf02126
	tapO	orf01174	orf00432	orf02081	orf00639	orf00937	orf03560	orf01921	orf00237	orf00283	orf00820	orf00940	orf00034	orf00397	orf00184	orf00321	orf00592	orf00221	orf02442	orf01663	orf00797	orf00358	orf02306	orf02354	orf02371	orf00907	orf00794	orf00325	orf00391	orf00031	orf02125
	tapP	orf01173	orf00431	orf02082	orf00638	orf00936	orf03561	orf01920	orf00236	orf00282	orf00819	orf00941	orf00033	orf00398	orf00183	orf00322	orf00593	orf00220	orf02443	orf01662	orf00798	orf00359	orf02305	orf02353	orf02370	orf00908	orf00793	orf00326	orf00392	orf00030	orf02124
	tapQ	orf01172	orf00430	orf02083	orf00637	orf00935	orf02787	orf01919	orf00235	orf00281	orf00818	orf00942	orf00032	orf00399	orf00182	orf00323	orf00594	orf00219	orf02444	orf01661	orf00799	orf00360	orf02304	orf02352	orf02369	orf00909	orf00792	orf00327	orf00393	orf00029	orf02123
	tapT	orf02209	orf02147	orf01706	orf02309	orf03010	orf01949	orf01854	orf02625	orf02600	orf02364	orf02261	orf02524	orf02481	orf02603	orf01940	orf01693	orf02611	orf02289	orf01822	orf02172	orf02568	orf02394	orf02525	orf02056	orf01672	orf01778	orf01884	orf02164	orf01729	orf02059
	tapU	orf02210	orf02148	orf01707	orf02310	orf03009	orf01950	orf01855	orf02626	orf02601	orf02363	orf02260	orf02525	orf02480	orf02604	orf01941	orf01692	orf02612	orf02290	orf01823	orf02173	orf02567	orf02395	orf02526	orf02057	orf01673	orf01779	orf01883	orf02165	orf01728	orf02060
	tapV	orf03187	orf02616	orf02383	orf03096	orf03597	orf03125	orf02486	orf02866	orf03162	orf02929	orf02971	orf03519	orf03408	orf03336	orf02507	orf02846	orf03373	orf03994	orf03651	orf02796	orf03157	orf03844	orf03595	orf03034	orf03115	orf03312	orf03161	orf03818	orf03227	orf03816
	tapW	orf02165	orf03850	orf03659	orf02208	orf02550	orf01712	orf02031	orf02338	orf02384	orf02203	orf04299	orf02396	orf02133	orf03806	orf01897	orf02194	orf02507	orf03885	orf03004	orf03785	orf02485	orf04442	orf02306	orf04486	orf04058	orf02255	orf03726	orf01960	orf03639	orf02429
	tapY1	orf00798	orf00925	orf01901	orf00971	orf01086	orf01363	orf00296	orf00967	orf00431	orf00969	orf01099	orf01010	orf00778	orf00508	orf01054	orf02083	orf01109	orf00791	orf01088	orf00896	orf02040	orf01771	orf02659	orf01360	orf02080	orf00704	orf00871	orf00626	orf01810	orf00586
	tapY2
	tppA	orf00797	orf00924	orf01900	orf00970	orf01085	orf01362	orf00295	orf00966	orf00430	orf00968	orf01098	orf01011	orf00777	orf00507	orf01055	orf02084	orf01108	orf00790	orf01087	orf00895	orf02041	orf01772	orf02660	orf01359	orf02081	orf00703	orf00870	orf00627	orf01811	orf00585
	tppB	orf00801	orf00928	orf01904	orf00974	orf01089	orf01366	orf00299	orf00970	orf00434	orf00972	orf01102	orf01007	orf00781	orf00511	orf01051	orf02080	orf01112	orf00794	orf01091	orf00899	orf02037	orf01768	orf02656	orf01363	orf02077	orf00707	orf00874	orf00623	orf01807	orf00589
	tppC
	tppD
	tppE	orf00802	orf00929	orf01905	orf00975	orf01090	orf01367	orf00300	orf00971	orf00435	orf00973	orf01103	orf01006	orf00782	orf00512	orf01050	orf02079	orf01113	orf00795	orf01092	orf00900	orf02036	orf01767	orf02655	orf01364	orf02076	orf00708	orf00875	orf00622	orf01806	orf00590
	tppF	orf02237	orf02176	orf01735	orf02338	orf02981	orf01978	orf01884	orf02654	orf02629	orf02335	orf02231	orf02553	orf02452	orf02631	orf01970	orf01662	orf02640	orf02318	orf01852	orf02200	orf02537	orf02425	orf02555	orf02090	orf01702	orf01808	orf01854	orf02194	orf01700	orf02088
Type I fimbriae	fimA					orf02633	orf01224					orf00590	orf02599				orf04125			orf00932		orf01354	orf01318		orf01152	orf00750	orf01146		orf03351	orf00734
	fimC	orf01375	orf02691	orf01181	orf02895	orf02635	orf01222	orf02715	orf01081	orf03259	orf00626	orf00588	orf02597	orf00577	orf00621	orf00601	orf04127	orf04033	orf00717	orf00930	orf00661	orf01356	orf01316	orf03185	orf01150	orf00748	orf01148	orf01507	orf02838	orf00732	orf03919
	fimD	orf01374	orf02690	orf01180	orf02894	orf02636	orf01221	orf02714	orf01082	orf03258	orf00625	orf00587	orf02596	orf00576	orf00620	orf00602	orf04128	orf04034	orf00716	orf00929	orf00662	orf01357	orf01315	orf03186	orf01149	orf00747	orf01149	orf01506	orf02839	orf00731	orf03918
	fimE											orf00586								orf00928		orf01358	orf01314			orf00746
	fimF	orf01373	orf02689	orf01179	orf02893	orf02637	orf01219	orf02712	orf01083	orf03257	orf00624	orf00585	orf02595	orf00575	orf00619	orf00603	orf04129	orf04035	orf00715	orf00927	orf00663	orf01359	orf01313	orf03188	orf01147	orf00745	orf01150	orf01505	orf02840	orf00730	orf03917
Accessory colonization factor(Vibrio)	acfC	orf01155	orf00413	orf02100	orf00620	orf00918	orf02770	orf01902	orf00218	orf00264	orf00801	orf04247	orf00015	orf00416	orf00165	orf00340	orf00611	orf00202	orf02461	orf04273	orf00816	orf00377	orf04205	orf02335	orf04444	orf04197	orf00775	orf00344	orf00410	orf00012	orf02106
T2SS	exeA	orf02078	orf00810	orf00680	orf01198	orf01416	orf00306	orf00863	orf01380	orf03532	orf03555	orf02599	orf01446	orf01040	orf01413	orf01725	orf01066	orf01244	orf01791	orf03170	orf01314	orf03855	orf03342	orf00087	orf03414	orf01877	orf00080	orf00684	orf00080	orf02051	orf00438
	exeB	orf02075	orf00807	orf00682	orf01200	orf01418	orf00308	orf00860	orf01382	orf03534	orf03557	orf02600	orf01448	orf01037	orf01415	orf01727	orf01068	orf01246	orf01793		orf01316	orf03857		orf00089			orf00082	orf00686	orf00082	orf02053	orf00440
	exeC	orf01755	orf03765	orf01394	orf02040	orf02332	orf03740	orf01478	orf01475	orf03848	orf00579	orf00542	orf02192	orf03735	orf03546	orf03610	orf03907	orf02278	orf00670	orf01548	orf00708	orf01504	orf02006	orf02151	orf01102	orf00702	orf03835	orf01460	orf03837	orf03824	orf00512
	exeD	orf01756	orf03766	orf01395	orf02039	orf02331	orf03739	orf01477	orf01474	orf03847	orf00578	orf00541	orf02191	orf03736	orf03547	orf03609	orf03906	orf02277	orf00669	orf01547	orf00709	orf01505	orf02007	orf02152	orf01101	orf00701	orf03834	orf01459	orf03836	orf03823	orf00511
	exeE	orf01757	orf03767	orf01396	orf02038	orf02330	orf03738	orf01476	orf01473	orf03846	orf00577	orf00540	orf02190	orf03737	orf03548	orf03608	orf03905	orf02276	orf00668	orf01546	orf00710	orf01506	orf02008	orf02153	orf01100	orf00700	orf03833	orf01458	orf03835	orf03822	orf00510
	exeF	orf01758	orf03768	orf01397	orf02037	orf02329	orf03737	orf01475	orf01472	orf03845	orf00576	orf00539	orf02189	orf03738	orf03549	orf03607	orf03904	orf02275	orf00667	orf01545	orf00711	orf01507	orf02009	orf02154	orf01099	orf00699	orf03832	orf01457	orf03834	orf03821	orf00509
	exeG	orf01759	orf03769	orf01398	orf02036	orf02328	orf03736	orf01474	orf01471	orf03844	orf00575	orf00538	orf02188	orf03739	orf03550	orf03606	orf03903	orf02274	orf00666	orf01544	orf00712	orf01508	orf02010	orf02155	orf01098	orf00698	orf03831	orf01456	orf03833	orf03820	orf00508
	exeH	orf01760	orf03770	orf01399	orf02035	orf02327	orf03735	orf01473	orf01470	orf03843	orf00574	orf00537	orf02187	orf03740	orf03551	orf03605	orf03902	orf02273	orf00665	orf01543	orf00713	orf01509	orf02012	orf02156	orf01097	orf00697	orf03830	orf01455	orf03832	orf03819	orf00507
	exeI	orf01761	orf03771	orf01400	orf02034	orf02326	orf03734	orf01472	orf01469	orf03842	orf00573	orf00535	orf02186	orf03741	orf03552	orf03604	orf03901	orf02272	orf00664	orf01541	orf00714	orf01510	orf02013	orf02157	orf01095	orf00695	orf03829	orf01454	orf03831	orf03818	orf00506
	exeJ	orf01762	orf03772	orf01401	orf02033	orf02325	orf03733	orf01471	orf01468	orf03841	orf00572	orf00534	orf02185	orf03742	orf03553	orf03603	orf03900	orf02271	orf00663	orf01540	orf00715	orf01511	orf02014	orf02158	orf01094	orf00694	orf03828	orf01453	orf03830	orf03817	orf00505
	exeK	orf01763	orf03773	orf01402	orf02032	orf02324	orf03732	orf01470	orf01467	orf03840	orf00571	orf00532	orf02184	orf03743	orf03554	orf03602	orf03899	orf02270	orf00662	orf01538	orf00716	orf01512	orf02015	orf02159	orf01092	orf00693	orf03827	orf01452	orf03829	orf03816	orf00504
	exeL	orf01764	orf03774	orf01403	orf02031	orf02323	orf03731	orf01469	orf01466	orf03839	orf00570	orf00531	orf02183	orf03744	orf03555	orf03601	orf03898	orf02269	orf00661	orf01537	orf00717	orf01513	orf02016	orf02160	orf01091	orf00692	orf03826	orf01451	orf03828	orf03815	orf00503
	exeM	orf01765	orf03775	orf01404	orf02030	orf02322	orf03730	orf01468	orf01465	orf03838	orf00569	orf00530	orf02182	orf03745	orf03556	orf03600	orf03897	orf02268	orf00660	orf01536	orf00718	orf01514	orf02017	orf02161	orf01090	orf00691	orf03825	orf01450	orf03827	orf03814	orf00502
	exeN	orf01766	orf03776	orf01405	orf02029	orf02321	orf03729	orf01467	orf01464	orf03837	orf00568	orf00529	orf02181	orf03746	orf03557	orf03599	orf03896	orf02267	orf00659	orf01535	orf00719	orf01515	orf02018	orf02162	orf01089	orf00690	orf03824	orf01449	orf03826	orf03813	orf00501
	tapD
T3SS	acr1
	acr2
	acrG
	acrH
	acrR
	acrV
	aexT
	aopB
	aopD
	aopH
	aopN
	aopO
	aopX
	ascB
	ascC
	ascD
	ascE
	ascF
	ascG
	ascH
	ascI
	ascJ
	ascK
	ascL
	ascN
	ascO
	ascP
	ascQ
	ascR
	ascS
	ascT
	ascU
	ascV
	ascX
	ascY
	ati1
	ati2
	exsA
	exsB
	exsC
	exsD
	exsE
	sycH
	sycO
	sycX
T6SS	Undetermined	orf02909	orf03055	orf00166	orf03210	orf00152	orf03089	orf03084	orf03435	orf03018	orf03331	orf03468	orf00599	orf03253	orf03433	orf03402	orf00280	orf03608	orf03252	orf03642	orf03208	orf03416	orf00242; orf03499	orf00265	orf04539	orf03519	orf00379	orf04000	orf01120	orf02981	orf03204
	atsA	orf02891	orf03037	orf03884	orf03192	orf00170	orf03070	orf03065	orf03417	orf03000	orf03312	orf03449	orf00581	orf03234	orf03415	orf03661	orf00261	orf04144	orf03233	orf04489	orf03190	orf03394	orf03480	orf00247	orf04069	orf03500	orf00360	orf03669	orf01101	orf02963	orf03222
	atsB	orf02892	orf03038	orf03883	orf03193	orf00169	orf03071	orf03066	orf03418	orf03001	orf03313	orf03450	orf00582	orf03235	orf03416	orf03662	orf00262	orf04143	orf03234	orf04490	orf03191	orf03395	orf03481	orf00248	orf04070	orf03501	orf00361	orf03668	orf01102	orf02964	orf03221
	atsC						orf03072	orf03067			orf03314			orf03236			orf00263		orf03235			orf03397			orf04071		orf00362		orf01103
	atsD	orf02893	orf03039	orf03882	orf03194	orf00168	orf03073	orf03068	orf03419	orf03002	orf03315	orf03452	orf00583	orf03237	orf03417	orf03663	orf00264	orf04142	orf03236	orf04492	orf03192	orf03398	orf03483	orf00249	orf04072	orf03503	orf00363	orf03667	orf01104	orf02965	orf03220
	atsG		orf03042		orf03197	orf00165	orf03076	orf03071	orf03422	orf03005	orf03318	orf03455	orf00586	orf03240			orf00267	orf03621	orf03239	orf03629		orf03402	orf03486	orf00252	orf04076	orf03506	orf00366		orf01107		orf03217
	atsH	orf02897	orf03043	orf00154	orf03198	orf00164	orf03077	orf03072	orf03423	orf03006	orf03319	orf03456	orf00587	orf03241	orf03421	orf03414	orf00268	orf03620	orf03240	orf03630	orf03196	orf03403	orf03487	orf00253	orf04077	orf03507	orf00367	orf03664	orf01108	orf02969	orf03216
	atsI	orf02898	orf03044	orf00155	orf03199	orf00163	orf03078	orf03073	orf03424	orf03007	orf03320	orf03457	orf00588	orf03242	orf03422	orf03413	orf00269	orf03619	orf03241	orf03631	orf03197	orf03404	orf03488	orf00254	orf04078	orf03508	orf00368	orf03663	orf01109	orf02970	orf03215
	atsJ	orf02899	orf03045	orf00156	orf03200	orf00162	orf03079	orf03074	orf03425	orf03008	orf03321	orf03458	orf00589	orf03243	orf03423	orf03412	orf00270	orf03618	orf03242	orf03632	orf03198	orf03405	orf03489	orf00255	orf04079	orf03509	orf00369	orf03662	orf01110	orf02971	orf03214
	atsK	orf02900	orf03046	orf00157	orf03201	orf00161	orf03080	orf03075	orf03426	orf03009	orf03322	orf03459	orf00590	orf03244	orf03424	orf03411	orf00271	orf03617	orf03243	orf03633	orf03199	orf03406	orf03490	orf00256	orf04080	orf03510	orf00370	orf03661	orf01111	orf02972	orf03213
	atsL	orf02901	orf03047	orf00158	orf03202	orf00160	orf03081	orf03076	orf03427	orf03010	orf03323	orf03460	orf00591	orf03245	orf03425	orf03410	orf00272	orf03616	orf03244	orf03634	orf03200	orf03407	orf03491	orf00257	orf04081	orf03511	orf00371	orf03660	orf01112	orf02973	orf03212
	atsP	orf02905	orf03051	orf00162	orf03206	orf00156	orf03085	orf03080	orf03431	orf03014	orf03327	orf03464	orf00595	orf03249	orf03429	orf03406	orf00276	orf03612	orf03248	orf03638	orf03204	orf03411	orf03495	orf00261	orf04543	orf03515	orf00375	orf04004	orf01116	orf02977	orf03208
	atsQ	orf02906	orf03052	orf00163	orf03207	orf00155	orf03086	orf03081	orf03432	orf03015	orf03328	orf03465	orf00596	orf03250	orf03430	orf03405	orf00277	orf03611	orf03249	orf03639	orf03205	orf03412	orf03496	orf00262	orf04542	orf03516	orf00376	orf04003	orf01117	orf02978	orf03207
	atsS	orf02908	orf03054	orf00165	orf03209	orf00153	orf03088	orf03083	orf03434	orf03017	orf03330	orf03467	orf00598	orf03252	orf03432	orf03403	orf00279	orf03609	orf03251	orf03641	orf03207	orf03414	orf03498	orf00264	orf04540	orf03518	orf00378	orf04001	orf01119	orf02980	orf03205
	clpV1	orf02903	orf03049	orf00160	orf03204	orf00158	orf03083	orf03078	orf03429	orf03012	orf03325	orf03462	orf00593	orf03247	orf03427	orf03408	orf00274	orf03614	orf03246	orf03636	orf03202	orf03409	orf03493	orf00259	orf04083	orf03513	orf00373	orf03658	orf01114	orf02975	orf03210
	dotU	orf02902	orf03048	orf00159	orf03203	orf00159	orf03082	orf03077	orf03428	orf03011	orf03324	orf03461	orf00592	orf03246	orf03426	orf03409	orf00273	orf03615	orf03245	orf03635	orf03201	orf03408	orf03492	orf00258	orf04082	orf03512	orf00372	orf03659	orf01113	orf02974	orf03211
	hcp1	orf02911	orf00356	orf03526	orf02584	orf01140	orf04232	orf04269	orf04197	orf01774	orf01390	orf01167; orf01560	orf01340	orf04214	orf01013	orf00997	orf02822	orf01829	orf03533	orf01203; orf03495	orf04195	orf00088	orf00243; orf02274	orf00726	orf00056	orf00446; orf01638	orf03936	orf02781	orf03375	orf02727	orf03372
	hcp	orf02889	orf03035	orf03886	orf03190	orf00172	orf03068	orf03063	orf03415	orf02998	orf03310	orf04524	orf00579	orf03232	orf03413	orf03659	orf00259	orf04146	orf03231	orf04556	orf03188	orf03392	orf04469	orf00245	orf02236	orf02453	orf00358	orf03671	orf01099	orf02961	orf03224
	vasH	orf02904	orf03050	orf00161	orf03205	orf00157	orf03084	orf03079	orf03430	orf03013	orf03326	orf03463	orf00594	orf03248	orf03428	orf03407	orf00275	orf03613	orf03247	orf03637	orf03203	orf03410	orf03494	orf00260	orf04544	orf03514	orf00374	orf04005	orf01115	orf02976	orf03209
	vasK/atsR	orf02907	orf03053	orf00164	orf03208	orf00154	orf03087	orf03082	orf03433	orf03016	orf03329	orf03466	orf00597	orf03251	orf03431	orf03404	orf00278	orf03610	orf03250	orf03640	orf03206	orf03413	orf03497	orf00263	orf04541	orf03517	orf00377	orf04002	orf01118	orf02979	orf03206
	vgrG1		orf00355		orf02583	orf03248	orf02488	orf02763	orf04138	orf01773	orf01389		orf01339	orf00536	orf01012	orf00996	orf02823	orf01828		orf00480		orf00087	orf00241	orf00725	orf00055	orf00445	orf03935		orf03376	orf02728
	vgrG2	orf02890	orf03036	orf03885	orf03191	orf00171	orf03069	orf03064	orf03416	orf02999	orf03311	orf03448	orf00580	orf03233	orf03414	orf03660	orf00260	orf04145	orf03232	orf04488	orf03189	orf03393	orf03479	orf00246	orf04068	orf03499	orf00359	orf03670	orf01100	orf02962	orf03223
	vgrG3	orf02910; orf03939	orf03056; orf03949	orf00167; orf02435	orf03211; orf04172	orf00151; orf02972	orf03090; orf04199	orf03085; orf04230	orf03436; orf04132	orf03019; orf04131	orf02763; orf03332	orf01559	orf00600; orf04050	orf03254; orf04030	orf03434; orf04135	orf03401; orf03927	orf00281; orf04142	orf03607; orf04141	orf03253; orf04150	orf01202	orf03209; orf03959	orf03417	orf02273	orf00266; orf04161		orf01637	orf00380; orf03969	orf03999; orf04155	orf01121; orf04194	orf02982; orf03980	orf03203; orf03974
	vipA	orf02894	orf03040	orf00152	orf03195	orf00167	orf03074	orf03069	orf03420	orf03003	orf03316	orf03453	orf00584	orf03238	orf03418	orf03416	orf00265	orf03623	orf03237	orf03627	orf03193	orf03400	orf03484	orf00250	orf04074	orf03504	orf00364	orf03666	orf01105	orf02966	orf03219
	vipB	orf02895	orf03041	orf00153	orf03196	orf00166	orf03075	orf03070	orf03421	orf03004	orf03317	orf03454	orf00585	orf03239	orf03419	orf03415	orf00266	orf03622	orf03238	orf03628	orf03194	orf03401	orf03485	orf00251	orf04075	orf03505	orf00365	orf03665	orf01106	orf02967	orf03218
Aerolysin AerA/Cytotoxic enterotoxin Act	aerA/act	orf03959	orf03971	orf03994	orf04197	orf04283	orf03509	orf04113	orf03728	orf03667	orf03724	orf03849	orf03716	orf03544	orf00708	orf03090	orf04236	orf04174	orf03677	orf02181	orf03523	orf04078	orf03476	orf03714	orf02593	orf03446	orf03536	orf03628	orf02419	orf04118	orf04143
Extracellular hemolysin AHH1	ahh1	orf01663	orf01962	orf00945	orf02141	orf00868	orf00885	orf01326	orf02445	orf02433	orf02127	orf01678	orf02356	orf02231	orf02485	orf02213	orf02116	orf02440	orf01311	orf01998	orf02555	orf02745	orf01812	orf02400	orf02296	orf00955	orf01531	orf01611	orf01893	orf00818	orf01141
Heatstable cytotonic enterotoxin	ast											orf02356								orf03892			orf02489		orf04291	orf04063
Hemolysin HlyA	hlyA	orf02832	orf00538	orf00528	orf00842	orf01256	orf02660	orf00578	orf00741	orf03311	orf01478	orf01363	orf03210	orf03159	orf00425	orf00464	orf00833	orf01038	orf00969	orf01008	orf00348	orf00614	orf01641	orf00960	orf01172	orf01950	orf02789	orf03108	orf00708	orf02548	orf03184
Hemolysin III	Undetermined	orf03105	orf02398	orf03574	orf03283	orf02845	orf02965	orf03388	orf03499	orf03796	orf03398	orf04329	orf03411	orf03318	orf03756	orf03068	orf02448	orf03780	orf03316	orf02283	orf03668	orf03673	orf02823	orf03782	orf04302	orf04102	orf03672	orf03675	orf03685	orf03588	orf03671
The repeat in toxin (RTX)	rtxA	orf00679	orf01195	orf01001	orf01618	orf01653	orf00695	orf01087	orf01635	orf01591	orf01853	orf00795	orf01620	orf00662	orf01756	orf01159	orf01450	orf00799	orf01948	orf00039	orf00594	orf01027	orf01879	orf01678	orf01944	orf00526	orf00630	orf00196	orf01377	orf00625	orf01011
	rtxB	orf00677	orf01192	orf00999	orf01615	orf01655	orf00693	orf01090	orf01632	orf02874	orf04188	orf00793	orf01618	orf00659	orf01758	orf01161	orf04329	orf00796	orf04178	orf00036	orf00592	orf01030	orf01881	orf01681	orf01941	orf00523	orf00632	orf00198	orf01379	orf00623	orf01014
	rtxC		orf01194		orf01617			orf01088	orf01634	orf01592	orf01854			orf00661			orf01449	orf00798	orf01949	orf00038		orf01028		orf01679	orf01943	orf00525					orf01012
	rtxD	orf00676	orf01191	orf00998	orf01614	orf01656	orf00692	orf01091	orf01631	orf02875	orf04187	orf00792	orf01617	orf00658	orf01759	orf01162	orf04330	orf00795	orf04177	orf00035	orf00591	orf01031	orf01882	orf01682	orf01940	orf00522	orf00633	orf00199	orf01380	orf00622	orf01015
	rtxE	orf00675	orf01190	orf00997	orf01613	orf01657	orf00691	orf01092	orf01630	orf02876	orf04186	orf00791	orf01616	orf00657	orf01760	orf01163	orf04331	orf00794	orf04176	orf00034	orf00590	orf01032	orf01883	orf01683	orf01939	orf00521	orf00634	orf00200	orf01381	orf00621	orf01016
	rtxH	orf00678	orf01193	orf01000	orf01616	orf01654	orf00694	orf01089	orf01633	orf01593	orf01855	orf00794	orf01619	orf00660	orf01757	orf01160	orf01448	orf00797	orf01950	orf00037	orf00593	orf01029	orf01880	orf01680	orf01942	orf00524	orf00631	orf00197	orf01378	orf00624	orf01013
Thermostable hemolysin (TH)	Undetermined	orf01869	orf00458	orf00507	orf00665	orf00964	orf01803	orf03936	orf00263	orf00309	orf00846	orf00915	orf00060	orf00371	orf00210	orf00295	orf00566	orf00247	orf02129	orf01688	orf00771	orf00330	orf02331	orf03932	orf04355	orf00882	orf00820	orf00299	orf00365	orf00057	orf03705
Exotoxin A (ETA) (Pseudomonas)	toxA	orf00895	orf01597	orf02955	orf01967	orf03301	orf02354	orf02213	orf01894	orf01029	orf03370		orf02276	orf00974	orf02941	orf02250	orf02719	orf02181	orf02759		orf01592	orf03008		orf03508			orf02899	orf00971	orf03096	orf02363	orf02449
Acinetobactin (Acinetobacter)	basB	orf04069	orf04156	orf04105	orf01532				orf00485	orf03401	orf03357		orf04121	orf04139	orf01104	orf04050		orf04123	orf04138		orf01849			orf04143			orf04179	orf04138	orf04156	orf00989	orf03227
	basG	orf00950	orf01815	orf03230	orf01527	orf01584	orf00562	orf00437	orf00490	orf01656	orf01723		orf01470	orf01189	orf01099	orf03872	orf04079	orf01652	orf00847		orf01854	orf04544		orf01408			orf02513	orf00525	orf00950	orf00994	orf01226
Capsule (Klebsiella)																									orf04751
Capsule (Acinetobacter)												orf04406; orf04408								orf04409; orf04411			orf04435		orf04443; orf04753; orf04756	orf04446
LPS rfb locus (Klebsiella)																									orf04792

## Sheet: other virulence genes
Isolate	Species	Fasta header	Identity %	Query / Template length	Contig	Position in contig
AH01	A. dhakensis	elastase	96.85	540 / 540	NODE_24_length_65404_cov_35.2312	46105..46644
		ahpA	96.88	800 / 800	NODE_54_length_31442_cov_32.8171	29052..29851
		alt	97.49	479 / 481	NODE_123_length_5798_cov_43.1002	2573..3051
		lip	82.17	387 / 380	NODE_123_length_5798_cov_43.1002	2208..2590
		dns	83.49	1175 / 1161	NODE_53_length_31660_cov_35.7953	25976..27134
AH02	A. dhakensis	elastase	96.85	540 / 540	NODE_27_length_62486_cov_26.9721	46103..46642
		ahpA	96.88	800 / 800	NODE_38_length_46831_cov_28.2966	29046..29845
		alt	97.49	479 / 481	NODE_123_length_5792_cov_30.7316	2567..3045
		lip	82.17	387 / 380	NODE_123_length_5792_cov_30.7316	2202..2584
		dns	83.49	1175 / 1161	NODE_42_length_45239_cov_25.485	4534..5692
AH03	A. dhakensis	elastase	96.85	540 / 540	NODE_21_length_64357_cov_29.8404	46103..46642
		ahpA	96.88	800 / 800	NODE_36_length_46837_cov_31.6685	29052..29851
		alt	97.49	479 / 481	NODE_127_length_5785_cov_33.6221	2567..3045
		lip	82.17	387 / 380	NODE_127_length_5785_cov_33.6221	2202..2584
		dns	83.49	1175 / 1161	NODE_1_length_177004_cov_27.8356	36081..37239
AH04	A. dhakensis	elastase	96.85	540 / 540	NODE_11_length_90891_cov_39.249	72668..73207
		ahpA	96.88	800 / 800	NODE_45_length_39641_cov_35.1391	37257..38056
		alt	97.49	479 / 481	NODE_62_length_30083_cov_50.332	26858..27336
		lip	82.17	387 / 380	NODE_62_length_30083_cov_50.332	26493..26875
		dns	83.49	1175 / 1161	NODE_55_length_31664_cov_37.7426	4533..5691
AH05	A. dhakensis	elastase	96.85	540 / 540	NODE_12_length_91714_cov_25.4667	51974..52513
		ahpA	96.88	800 / 800	NODE_53_length_31441_cov_23.8339	29049..29848
		alt	97.49	479 / 481	NODE_57_length_30085_cov_34.9231	2750..3228
		lip	82.17	387 / 380	NODE_57_length_30085_cov_34.9231	3211..3593
		dns	83.49	1175 / 1161	NODE_3_length_175738_cov_25.3557	34023..35181
AH06	A. dhakensis	elastase	96.85	540 / 540	NODE_7_length_85834_cov_28.6314	39193..39732
		ahpA	96.88	800 / 800	NODE_55_length_31438_cov_26.6763	1591..2390
		alt	97.49	479 / 481	NODE_127_length_5804_cov_35.0983	2571..3049
		lip	82.17	387 / 380	NODE_127_length_5804_cov_35.0983	2206..2588
		dns	83.49	1175 / 1161	NODE_11_length_76794_cov_29.2565	36080..37238
AH07	A. dhakensis	elastase	96.85	540 / 540	NODE_19_length_64368_cov_25.713	46105..46644
		ahpA	96.88	800 / 800	NODE_37_length_46837_cov_27.5152	29052..29851
		alt	97.49	479 / 481	NODE_65_length_30046_cov_34.822	26858..27336
		lip	82.17	387 / 380	NODE_65_length_30046_cov_34.822	26493..26875
		dns	83.49	1175 / 1161	NODE_41_length_45002_cov_25.1454	4525..5683
AH09	A. dhakensis	elastase	96.85	540 / 540	NODE_27_length_64353_cov_36.403	46217..46756
		ahpA	96.88	800 / 800	NODE_36_length_54309_cov_35.0144	37257..38056
		alt	97.49	479 / 481	NODE_57_length_30069_cov_47.4422	26858..27336
		lip	82.17	387 / 380	NODE_57_length_30069_cov_47.4422	26493..26875
		dns	83.49	1175 / 1161	NODE_17_length_78482_cov_34.0676	72790..73948
AH10	A. dhakensis	elastase	96.85	540 / 540	NODE_6_length_110829_cov_24.0474	46105..46644
		ahpA	96.88	800 / 800	NODE_48_length_46102_cov_24.0687	29050..29849
		alt	97.49	479 / 481	NODE_59_length_29973_cov_32.9908	26738..27216
		lip	82.17	387 / 380	NODE_59_length_29973_cov_32.9908	26373..26755
		dns	83.49	1175 / 1161	NODE_26_length_69702_cov_24.1492	64018..65176
AH13	A. dhakensis	elastase	96.85	540 / 540	NODE_20_length_64448_cov_36.0566	46217..46756
		ahpA	96.88	800 / 800	NODE_38_length_46042_cov_34.1437	29052..29851
		alt	97.49	479 / 481	NODE_58_length_30070_cov_45.3698	26858..27336
		lip	82.17	387 / 380	NODE_58_length_30070_cov_45.3698	26493..26875
		dns	83.49	1175 / 1161	NODE_54_length_31680_cov_35.4622	4534..5692
AH28	A. dhakensis	elastase	96.85	540 / 540	NODE_8_length_124011_cov_33.0568	46217..46756
		ahpA	96.88	800 / 800	NODE_54_length_31449_cov_31.7126	1599..2398
		alt	97.49	479 / 481	NODE_100_length_5854_cov_39.0775	2752..3230
		lip	82.17	387 / 380	NODE_100_length_5854_cov_39.0775	3213..3595
		dns	83.49	1175 / 1161	NODE_3_length_145746_cov_33.8152	4526..5684
AH41	A. dhakensis	elastase	96.85	540 / 540	NODE_26_length_64348_cov_34.8638	46105..46644
		ahpA	96.88	800 / 800	NODE_56_length_31441_cov_31.3521	29049..29848
		alt	97.49	479 / 481	NODE_57_length_29957_cov_44.8727	26732..27210
		lip	82.17	387 / 380	NODE_57_length_29957_cov_44.8727	26367..26749
		dns	83.49	1175 / 1161	NODE_43_length_45243_cov_32.4714	4529..5687
AH42	A. dhakensis	elastase	96.85	540 / 540	NODE_7_length_111017_cov_29.4965	46217..46756
		ahpA	96.88	800 / 800	NODE_47_length_39644_cov_28.978	37257..38056
		alt	97.49	479 / 481	NODE_108_length_5786_cov_39.0151	2564..3042
		lip	82.17	387 / 380	NODE_108_length_5786_cov_39.0151	2199..2581
		dns	83.49	1175 / 1161	NODE_42_length_45240_cov_30.1082	4525..5683
AH45	A. dhakensis	elastase	96.85	540 / 540	NODE_22_length_64441_cov_27.064	46205..46744
		ahpA	96.88	800 / 800	NODE_37_length_46106_cov_26.5848	29054..29853
		alt	97.49	479 / 481	NODE_133_length_5804_cov_26.4116	2569..3047
		lip	82.17	387 / 380	NODE_133_length_5804_cov_26.4116	2204..2586
		dns	83.49	1175 / 1161	NODE_39_length_45238_cov_26.0099	4526..5684
AH47	A. dhakensis	elastase	96.85	540 / 540	NODE_7_length_116784_cov_31.3841	51974..52513
		ahpA	96.88	800 / 800	NODE_40_length_46840_cov_35.805	29055..29854
		alt	97.49	479 / 481	NODE_60_length_30085_cov_44.9029	2750..3228
		lip	82.17	387 / 380	NODE_60_length_30085_cov_44.9029	3211..3593
		dns	83.49	1175 / 1161	NODE_6_length_122806_cov_32.2808	4531..5689
AH58	A. dhakensis	elastase	96.85	540 / 540	NODE_4_length_145302_cov_33.0349	46103..46642
		ahpA	96.88	800 / 800	NODE_50_length_33933_cov_36.5648	16719..17518
		alt	97.49	479 / 481	NODE_54_length_29981_cov_43.6609	26756..27234
		lip	82.17	387 / 380	NODE_54_length_29981_cov_43.6609	26391..26773
		dns	83.49	1175 / 1161	NODE_3_length_177090_cov_32.6649	139852..141010
AH59	A. dhakensis	elastase	96.85	540 / 540	NODE_4_length_155646_cov_29.6649	51974..52513
		ahpA	96.88	800 / 800	NODE_79_length_18819_cov_27.8566	16416..17215
		alt	97.49	479 / 481	NODE_56_length_29967_cov_39.2363	26732..27210
		lip	82.17	387 / 380	NODE_56_length_29967_cov_39.2363	26367..26749
		dns	83.49	1175 / 1161	NODE_38_length_45224_cov_29.0747	4533..5691
AH63	A. dhakensis	elastase	96.85	540 / 540	NODE_23_length_64352_cov_45.6413	46217..46756
		ahpA	96.88	800 / 800	NODE_38_length_46042_cov_42.3096	29052..29851
		alt	97.49	479 / 481	NODE_54_length_29944_cov_58.2159	26732..27210
		lip	82.17	387 / 380	NODE_54_length_29944_cov_58.2159	26367..26749
		dns	83.49	1175 / 1161	NODE_39_length_45247_cov_42.9578	4537..5695
AH70	A. dhakensis	elastase	96.85	540 / 540	NODE_20_length_70200_cov_33.359	51974..52513
		ahpA	96.88	800 / 800	NODE_38_length_46454_cov_32.8244	29051..29850
		alt	97.49	479 / 481	NODE_56_length_30083_cov_42.2199	26858..27336
		lip	82.17	387 / 380	NODE_56_length_30083_cov_42.2199	26493..26875
		dns	83.49	1175 / 1161	NODE_15_length_78139_cov_31.4169	72448..73606
AH75	A. dhakensis	elastase	96.85	540 / 540	NODE_5_length_123921_cov_28.5036	46103..46642
		ahpA	96.88	800 / 800	NODE_55_length_31442_cov_25.5548	29052..29851
		alt	97.49	479 / 481	NODE_56_length_29892_cov_36.7929	26732..27210
		lip	82.17	387 / 380	NODE_56_length_29892_cov_36.7929	26367..26749
		dns	83.49	1175 / 1161	NODE_10_length_101272_cov_27.5842	64018..65176
AH82	A. dhakensis	elastase	96.85	540 / 540	NODE_17_length_64241_cov_25.4403	46105..46644
		ahpA	96.88	800 / 800	NODE_61_length_31425_cov_22.254	29051..29850
		alt	97.49	479 / 481	NODE_133_length_5786_cov_30.8324	2561..3039
		lip	82.17	387 / 380	NODE_133_length_5786_cov_30.8324	2196..2578
		dns	83.49	1175 / 1161	NODE_2_length_141904_cov_23.6433	4533..5691
AH84	A. dhakensis	elastase	96.85	540 / 540	NODE_85_length_19527_cov_22.6153	17700..18239
		ahpA	96.88	800 / 800	NODE_57_length_34472_cov_25.5642	17420..18219
		alt	97.49	479 / 481	NODE_68_length_29957_cov_32.8181	26732..27210
		lip	82.17	387 / 380	NODE_68_length_29957_cov_32.8181	26367..26749
		dns	83.49	1175 / 1161	NODE_65_length_31668_cov_24.7922	4537..5695
AH85	A. dhakensis	elastase	96.85	540 / 540	NODE_12_length_85020_cov_23.7842	46217..46756
		ahpA	96.88	800 / 800	NODE_77_length_18798_cov_22.4882	1577..2376
		alt	97.49	479 / 481	NODE_123_length_5792_cov_29.6688	2567..3045
		lip	82.17	387 / 380	NODE_123_length_5792_cov_29.6688	2202..2584
		dns	83.49	1175 / 1161	NODE_30_length_56165_cov_23.9774	15460..16618
AH86	A. dhakensis	elastase	96.85	540 / 540	NODE_4_length_123910_cov_22.7686	46103..46642
		ahpA	96.88	800 / 800	NODE_58_length_31439_cov_21.9951	1583..2382
		alt	97.49	479 / 481	NODE_60_length_29959_cov_30.5534	26732..27210
		lip	82.17	387 / 380	NODE_60_length_29959_cov_30.5534	26367..26749
		dns	83.49	1175 / 1161	NODE_36_length_42410_cov_23.0772	1696..2854
AH87	A. dhakensis	elastase	96.85	540 / 540	NODE_24_length_64331_cov_26.6753	46205..46744
		ahpA	96.88	800 / 800	NODE_83_length_19803_cov_23.5817	17420..18219
		alt	97.49	479 / 481	NODE_82_length_21061_cov_30.2615	2565..3043
		lip	82.17	387 / 380	NODE_82_length_21061_cov_30.2615	2200..2582
		dns	83.49	1175 / 1161	NODE_26_length_63239_cov_26.0123	25976..27134
AH15	A. hydrophila	elastase	98.7	540 / 540	NODE_79_length_19614_cov_29.3969	2708..3247
		ser	98.23	282 / 282	NODE_84_length_18310_cov_35.7269	602..883
		alt	99.37	479 / 481	NODE_42_length_40990_cov_38.3772	26167..26645
		lip	81.07	391 / 380	NODE_42_length_40990_cov_38.3772	25802..26184
		dns	82.7	948 / 1161	NODE_47_length_38179_cov_29.4375	4045..4969
AH61	A. hydrophila	elastase	98.7	540 / 540	NODE_82_length_19610_cov_26.5935	16368..16907
		ser	98.23	282 / 282	NODE_94_length_17401_cov_26.7363	16517..16798
		alt	99.37	479 / 481	NODE_34_length_40987_cov_32.9216	14343..14821
		lip	81.07	391 / 380	NODE_34_length_40987_cov_32.9216	14804..15186
		dns	82.7	948 / 1161	NODE_140_length_6862_cov_24.4646	4046..4970
AH72	A. hydrophila	elastase	98.7	540 / 540	NODE_76_length_19600_cov_28.9332	2694..3233
		ser	98.23	282 / 282	NODE_81_length_18312_cov_34.8771	17428..17709
		alt	99.37	479 / 481	NODE_41_length_40985_cov_38.1932	14341..14819
		lip	81.07	391 / 380	NODE_41_length_40985_cov_38.1932	14802..15184
		dns	82.7	948 / 1161	NODE_124_length_6966_cov_28.9795	1893..2817
AH80	A. hydrophila	elastase	98.7	540 / 540	NODE_76_length_19601_cov_23.1583	16374..16913
		ser	98.23	282 / 282	NODE_79_length_18306_cov_27.4676	598..879
		alt	99.37	479 / 481	NODE_41_length_40985_cov_30.2063	26167..26645
		lip	81.07	391 / 380	NODE_41_length_40985_cov_30.2063	25802..26184
		dns	82.7	948 / 1161	NODE_130_length_6979_cov_23.4315	4160..5084
AH81	A. hydrophila	elastase	98.7	540 / 540	NODE_122_length_6661_cov_24.8053	3418..3957
		ser	98.23	282 / 282	NODE_72_length_18311_cov_32.4175	603..884
		alt	99.37	479 / 481	NODE_40_length_40985_cov_35.4894	26167..26645
		lip	81.07	391 / 380	NODE_40_length_40985_cov_35.4894	25802..26184
		dns	82.7	948 / 1161	NODE_121_length_6900_cov_24.6395	1893..2817
